# Supplementary material
Source: ML conference proceedings conference paper supplement (https://openaccess.thecvf.com/content/CVPR_2019/html/Bergmann_MVTec_AD_--_CVPR_2019_paper.html)
Supplement: Supplementary file 2 [file Bergmann_MVTec_AD_--_CVPR_2019_supplemental.zip]

Archive with 2 entries (2 files):
- 4769_supplementary.pdf
- 4769_supplementary_video.mp4
